1 **Title:**

2 The clinically approved antiviral drug sofosbuvir impairs Brazilian zika virus  
3 replication

4 **Running title:** sofosbuvir impairs zika virus replication

5 **Authors:**

6 Caroline Q. Sacramento<sup>1,5,10,#</sup>, Gabrielle R. de Melo<sup>1,5,10,#</sup>, Natasha Rocha<sup>1,5,10, #</sup>, Lucas  
7 Villas Bôas Hoelz<sup>6</sup>, Milene Mesquita<sup>4,8</sup>, Caroline S. de Freitas<sup>1,5,10</sup>, Natalia Fintelman-  
8 Rodrigues<sup>1,5,10</sup>, Andressa Marttorelli<sup>1,5,10</sup>, André C. Ferreira<sup>1,5,10</sup>, Giselle Barbosa-  
9 Lima<sup>1,5,10</sup>, Mônica M. Bastos<sup>6</sup>, Eduardo de Mello Volotão<sup>2</sup>, Diogo A. Tschoeke<sup>8,9</sup>  
10 Luciana Leomil<sup>8,9</sup>, Fernando A. Bozza<sup>1,5</sup>, Patrícia T. Bozza<sup>1</sup>, Nubia Boechat<sup>6</sup>, Fabiano  
11 L. Thompson<sup>8,9</sup>, Ana M. B. de Filippis<sup>3</sup>, Karin Brüning<sup>7</sup> and Thiago Moreno L.  
12 Souza<sup>1,5,10,\*</sup>

13 # - These authors contributed equally to this work

14 **Affiliations:**

15 1 – Laboratório de Imunofarmacologia, Instituto Oswaldo Cruz (IOC), Fundação  
16 Oswaldo Cruz (Fiocruz), Rio de Janeiro, RJ, Brazil.

17 2 – Laboratório de Virologia Comparada e Ambiental, IOC, Fiocruz, Rio de Janeiro, RJ,  
18 Brazil.

19 3 – Laboratório de Flavivírus, IOC, Fiocruz, Rio de Janeiro, RJ, Brazil.

20 4 – Laboratório de Vírus Respiratório e do Sarampo, IOC, Fiocruz, Rio de Janeiro, RJ,  
21 Brazil.

22 5 – Instituto Nacional de Infectologia (INI), Fiocruz, Rio de Janeiro, RJ, Brazil.

23 6 – Instituto de Tecnologia de Fármacos (Farmanguinhos), Fiocruz, Rio de Janeiro, RJ,  
24 Brazil.

25 7 – BMK Consortium: Blanver Farmoquímica Ltda; Microbiológica Química e  
 26 Farmacêutica Ltda; Karin Bruning & Cia. Ltda, Brazil  
 27 8 – Instituto de Biologia, Universidade Federal do Rio de Janeiro (UFRJ), Rio de  
 28 Janeiro, RJ, Brazil.  
 29 9 – SAGE –COPPE, UFRJ, Rio de Janeiro, RJ, Brazil.  
 30 10 - National Institute for Science and Technology on Innovation on Neglected  
 31 Diseases (INCT/IDN), Center for Technological Development in Health (CDTS),  
 32 Fiocruz, Rio de Janeiro, RJ, Brazil.

33 **Correspondence footnote:**

34 Thiago Moreno L. Souza, PhD

35 \*\*\*\*\*

36 Fundação Oswaldo Cruz

37 Centro de Desenvolvimento Tecnológico em Saúde (CDTS)

38 Instituto Oswaldo Cruz (IOC)

39 Pavilhão Osório de Almeida, sala 16

40 Av. Brasil 4365, Manguinhos, Rio de Janeiro - RJ, Brasil, CEP 21060340

41 Tel: +55 21 2562-1311

42 Email: [tmoreno@cdts.fiocruz.br](mailto:tmoreno@cdts.fiocruz.br)

43

44

45

46

47

48

49

50  
51  
52  
53  
54  
55  
56  
57  
58  
59  
60  
61  
62  
63  
64  
65  
66  
67  
68  
69  
70  
71  
72  
73  
74  
75  
76  
77  
78  
79  
80

## Summary

Zika virus (ZIKV) is a member of *Flaviviridae* family, as other agents of clinical significance, such as dengue (DENV) and hepatitis C (HCV) viruses. ZIKV spread from Africa to Pacific and South American territories, emerging as an etiological pathogen of neurological disorders, during fetal development and in adulthood. Therefore, antiviral drugs able to inhibit ZIKV replication are necessary. Broad spectrum antivirals, such as interferon, ribavirin and favipiravir, are harmful for pregnant animal models and women. The clinically approved uridine nucleotide analog anti-HCV drug, sofosbuvir, has not been affiliated to teratogenicity. Sofosbuvir target the most conserved protein over the members of the *Flaviviridae* family, the viral RNA polymerase. We thus studied ZIKV susceptibility to sofosbuvir. We initially characterized a Brazilian ZIKV strain for use in experimental assays. Sofosbuvir inhibits the Brazilian ZIKV replication in a dose-dependent manner, both in BHK-21 cells and SH-Sy5y, by targeting ZIKV RNA polymerase activity, with the involvement of conserved amino acid residues over the members of *Flaviviridae* family. The identification of clinically approved antiviral drugs endowed with anti-ZIKV could reduce the time frame in pre-clinical development. Altogether, our data indicates that sofosbuvir chemical structure is endowed with anti-ZIKV activity.

**Key-words:** Zika virus, antiviral, sofosbuvir, nucleoside/nucleotide analogs, microcephaly and Guillain-Barré syndrome, inhibitors.

81

82

83

## 84 INTRODUCTION

85 Zika virus (ZIKV) is a member of the *Flaviviridae* family, which includes  
86 several agents of clinical significance, such as dengue (DENV), hepatitis C (HCV), west  
87 Nile (WNV) and Japanese encephalitis (JEV) viruses, among others. This emerging  
88 pathogen is an enveloped, positive-sense single stranded RNA virus. Although ZIKV is  
89 an arthropod-borne virus (arbovirus) transmitted by mosquitos of the genus *Aedes* (1),  
90 transmission through sexual contact have been described (2).

91 In 1947, in the Zika forest of Uganda, ZIKV was originally identified in sentinel  
92 monkeys (3). After occasional episodes of infection in humans in the 50's, outbreaks  
93 have been registered in 2007 (Federated States of Micronesia) and 2013 (French  
94 Polynesia) (1). Computational analyses suggest that ZIKV may have been introduced in  
95 Brazil already in 2013 (4). In 2015, ZIKV explosively spread across the Brazilian  
96 territory and to neighbor countries. Although the epidemiological numbers of zika  
97 infection in Brazil may be underestimated – due to limited resources for patient  
98 assessments in area where people live below the poverty line – it was predicted that  
99 more than 4 million persons were infected (5). ZIKV provokes mild and self-limited  
100 exanthematic disease with no or low-grade fever for many patients (6). Remarkably,  
101 however, ZIKV infection has been associated to congenital malformations, including  
102 microcephaly, and Guillain-Barré syndrome (GBS), based on clinical and laboratorial  
103 data (7, 8). Consequently, the World Health Organization (WHO) declared ZIKV  
104 infection as a public health emergency of international concern. Antiviral treatments  
105 against ZIKV are therefore necessary, because they could not only mitigate ZIKV  
106 morbidities but also impair chain of transmission and possess prophylactic activity.

107 Several broad-spectrum antiviral agents are harmful over pregnant animal  
108 models and women. Interferons (IFNs) are abortive, ribavirin and favipiravir are  
109 teratogenic (9, 10). Currently, at least three studies have been published in the field of  
110 small molecules inhibitors of anti-ZIKV replication (11-13). In these studies, the  
111 authors used in their experimental infections the African ZIKV (ZIKV<sup>AFR</sup>) as a  
112 prototype (11-13). Importantly, it has been shown that ZIKV<sup>AFR</sup> is more virulent than  
113 the ZIKV strain circulating in Brazil (ZIKV<sup>BRA</sup>) (14), meaning that one might neglected

114 a promising clinically approved compound by screening libraries of compounds over  
115 ZIKV<sup>AFR</sup>.

116 Delvecchio et al. evaluated the pharmacological activity of chloroquine against  
117 ZIKV replication (11). Whether chloroquine main mechanism of action relates to the  
118 blockage of viral life cycle or promotion of cellular defenses needs to be detailed (11).  
119 The studies from Zmurko et al. and Eyer et al. show the anti-ZIKV activity novel  
120 nucleoside analogs (12, 13). As these last two works have focused on novel molecules,  
121 extensive pre-clinical studies must be carried out before the translation of their data into  
122 clinical trials.

123 Among the *Flaviviridae* family, the gene encoding the RNA polymerase shows  
124 the highest degree of conservation (15). Therefore, new therapeutic options against  
125 HCV, specially targeting the viral RNA polymerase, could have a broader spectrum  
126 over other members of the *Flaviviridae* family. In this regard, sofosbuvir was clinically  
127 approved in the last years for therapeutic intervention against HCV infection.  
128 Sofosbuvir is a phosphoramidate uridine nucleotide prodrug, which has to be  
129 triphosphorylated within the cells to aim the viral RNA polymerase (16). The Food and  
130 Drug Administration (FDA) categorizes sofosbuvir as a class B substance: “Animal  
131 reproduction studies have failed to demonstrate a risk to the fetus and there are no  
132 adequate and well-controlled studies in pregnant women”. The Australian’s equivalent  
133 agency, Therapeutic Goods Administration (TGA), suggests a safer use of sofosbuvir,  
134 by categorizing this substance as B1: “Drugs which have been taken by only a limited  
135 number of pregnant women and women of childbearing age, without an increase in the  
136 frequency of malformation or other direct or indirect harmful effects on the human fetus  
137 having been observed”. Altogether, these information motivated us to investigate  
138 whether sofosbuvir chemical structure possesses anti-ZIKV activity.

## 139 MATERIAL AND METHODS

140 **Reagents.** The antiviral sofosbuvir,  $\beta$ -d-2'-deoxy-2'- $\alpha$ -fluoro-2'- $\beta$ -C-methyluridine, was  
141 donated by the BMK Consortium: Blanver Farmoquímica Ltda; Microbiológica  
142 Química e Farmacêutica Ltda; Karin Bruning & Cia. Ltda, (Toboão da Serra, São Paulo,  
143 Brazil). Ribavirin was received as donation form the Instituto de Tecnologia de  
144 Farmacos (Farmanguinhos, Fiocruz). Sofosbuvir triphosphate (STP),  $\beta$ -d-2'-deoxy-2'- $\alpha$ -

145 fluoro-2'- $\beta$ -C-methyluridine triphosphate, ribavirin triphosphate (RTP) and AZT-  
146 triphosphate (AZT-TP) were purchased (Codontech.org, CA and Sierra Bioresearch,  
147 AZ). Interferon-alpha was purchased from R&D bioscience. All small molecule  
148 inhibitors were dissolved in 100 % dimethylsulfoxide (DMSO) and, subsequently,  
149 diluted in culture or reaction medium minimally  $10^4$ -fold before each assay. The final  
150 DMSO concentrations showed no cytotoxicity. Materials for cell culture were  
151 purchased from Thermo Scientific Life Sciences (Grand Island, NY), unless otherwise  
152 mentioned.

153

154 **Cells.** Human neuroblastoma (SH-Sy5y; ATCC), baby hamster kidney (BHK-21) and  
155 African green monkey kidney cells (Vero) cells were cultured in MEM:F-12 (1:1),  
156 MEM and DMEM, respectively. *Aedes albopictus* cells (C6/36) were grown in L-15  
157 medium supplemented with 0.3% tryptose phosphate broth, 0.75 g/L sodium  
158 bicarbonate, 1.4 mM glutamine, and nonessential amino acids. The culture medium of  
159 the cell types was supplemented with 10 % fetal bovine serum (FBS; HyClone, Logan,  
160 Utah), 100 U/mL penicillin, and 100  $\mu$ g/mL streptomycin(17, 18). Mammals cells were  
161 kept at 37 °C in 5% CO<sub>2</sub>, whereas mosquito cells were maintained at 26 °C. Passages of  
162 SH-sy5y cells included both adherent and non-adherent cells.

163

164 **Virus.** ZIKV was isolated from a serum sample of confirmed case from Rio de Janeiro,  
165 Brazil. This sample was received and diagnosed by the Reference Laboratory for  
166 Flavivirus, Fiocruz, Brazilian Ministry of Health, as part of the surveillance system  
167 against arboviruses(3). ZIKV was originally isolated in C6/36 cells, tittered by plaque-  
168 forming assay and further passaged at the multiplicity of infection (MOI) of 0.01. Virus  
169 passages were performed by inoculating C6/36 cells for 1 h at 26 °C. Next, residual

170 viruses were washed out with phosphate-buffered saline (PBS) and cells were cultured  
171 for an additional 9 days. After this period, cells were lysed by freezing and thawing,  
172 centrifuged at 1,500 x g at 4 °C for 20 min to remove cellular debris.

173 ZIKV was purified in between fractions of 50 % and 20 % sucrose.  
174 Sucrose gradients were made in 40 mL ultracentrifuge tubes (Ultra-clear; Beckman,  
175 Fullerton, CA) in PBS without  $\text{Ca}^{++}$  and  $\text{Mg}^{++}$  (pH 7.4). Tubes were allowed to stand  
176 for 2 h at room temperature. Up to 20 mL of virus was added to each tube and  
177 centrifuged in a SW 28 rotor (Beckman) at 10,000 rpm for 4 h at 4 °C. Fractions were  
178 collected and assayed for total protein and for virus-induced hemagglutination (HA),  
179 with turkey red blood cells (Fitzgerald Industries International, North Acton, MA).  
180 Fractions displaying HA activity ( $\geq 16$  UHA/50  $\mu\text{L}$ ) were pooled and dialyzed against  
181 PBS without  $\text{Ca}^{++}$  and  $\text{Mg}^{++}$  (pH 7.4) and 10 % sucrose overnight at 4 °C. Virus pools  
182 were filtered through a 0.22- $\mu\text{m}$  membranes (Chemicon, Millipore, Bedford, NY).  
183 Infectious virus titers were determined by plaque assay in BHK-21 cells and stored at -  
184 70 °C for further studies.

185

186 **Cytotoxicity assay.** Monolayers of  $10^4$  BHK-21 or  $5 \times 10^4$  SH-Sy5y cells in 96-  
187 multiwell plates were treated with various concentrations of sofosbuvir or ribavirin, as  
188 an additional control, for 5 days. Then, 2,3-Bis-(2-Methoxy-4-Nitro-5-Sulfohenyl)-2H-  
189 Tetrazolium-5-Carboxanilide (XTT) at 5 mg/ml was added in DMEM in the presence of  
190 0.01 % of N-methyl- dibenzopirazina methyl sulfate (PMS). After incubation for 4 h at  
191 37 °C, plates were read in a spectrophotometer at 492 nm and 620 nm(19). The 50 %  
192 cytotoxic concentration ( $\text{CC}_{50}$ ) was calculated by non-linear regression analysis of the  
193 dose–response curves.

194 **Plaque forming assay.** Monolayers of BHK-21 in 6-well plates were exposed to  
195 different dilutions of the supernatant from yield-reduction assays for 1 h at 37 °C. Next,  
196 cells were washed with PBS and DMEM containing 1 % FBS and 3 %  
197 carboxymethylcellulose (Fluka) (overlay medium) was added to cells. After 5 days at 37  
198 °C, the monolayers were fixed with 10 % formaldehyde in PBS and stained with a 0.1  
199 % solution of crystal violet in 70 % methanol, and the virus titers were calculated by  
200 scoring the plaque forming units (PFU).

201 **Yield-reduction assay.** Monolayers of  $10^4$  BHK-21, Vero or  $5 \times 10^4$  SH-Sy5y cells in  
202 96-multiwell plates were infected with ZIKV at indicated MOIs for 1 h at 37 °C. Cells  
203 were washed with PBS to remove residual viruses and various concentrations of  
204 sofosbuvir, or interferon-alpha as a positive control, in MEM with 1 % FBS were added.  
205 After 24 h, cells were lysed, cellular debris was cleared by centrifugation, and virus  
206 titers in the supernatant were determined by PFU/mL. Non-linear regression of the  
207 dose-response curves was performed to calculate the inhibitory activity of ZIKV-  
208 induced plaque formation by 50 % ( $EC_{50}$ ) .

209 **Preparation of ZIKV RNA polymerase.** ZIKV RNA polymerase was obtained from  
210 ZIKV-infected BHK-21 cells. Cells were infected with ZIKV at a MOI of 10 for 24 h,  
211 lysed with buffer containing 0.25 M potassium phosphate (pH 7.5), 10 mM 2-  
212 mercaptoethanol (2-ME), 1 mM EDTA, 0.5% Triton X-100, 0.5 mM phenylmethane  
213 sulfonylfluoride (PMSF) and 20% glycerol, sonicated and centrifuged at  $10,000 \times g$  for  
214 10 min at 4 °C. The resulting supernatant was further centrifuged at  $100,000 \times g$  for 90  
215 min at 4 °C and passed through two ion-exchange columns, DEAE- and phopho-cellulose  
216 (17).

217 **RNA polymerase inhibition assay.** ZIKV RNA polymerase inhibition assays was  
218 adapted from previous publication (20). The reaction mixture for measurements ZIKV



RNA-dependent RNA-polymerase (RDRP) activity was composed of 50 mM hepes (pH 7.3), 0.4 mM of each ribonucleotide (ATP, GTP, CTP and labelled UTP), 0.4 mM dithiothreitol, 3 mM MgCl<sub>2</sub>, 500 ng of ZIKV genomic RNA and cell extracts. ZIKAV RNA was obtained with QIAmp viral RNA mini kit (Qiagen, Duesseldorf, Germany), according to manufacturer instructions, except for the use of RNA carrier. The reaction mixtures were incubated for 1 h at 30 °C in the presence or absence of the drugs. Reactions were stopped with addition of EDTA to make a 10 mM final solution.

The labelled UTP mentioned above represents an equimolar ratio between biotinylated-UTP and digoxigenin-UTP (DIG-UTP) (both from Roche Life Sciences, Basel, Switzerland). Detection of incorporated labeled UTP nucleotides was performed by amplified luminescent proximity homogeneous assay (ALPHA; PerkinElmer, Waltham, MA). In brief, streptavidin-donor and anti-DIG-acceptor beads were incubated with the stopped reaction mixture for 2 h at room temperature. Then, plates containing were read in the EnSpire® multimode plate reader instrument (PerkinElmer). Different types blank controls were used, such as reaction mixtures without cellular extracts and control reaction mixture without inhibitor and beads. In addition, the extract from mock-infected cells was also assayed, to evaluate the presence of RNA-dependent RNA-polymerase activity unrelated to ZIKV. Non-linear regression curves were generated to calculate IC<sub>50</sub> values for the dose-response effect of the compounds.

**Comparative molecular modeling.** The amino acid sequence encoding of ZIKV RNA polymerase (ZVRP) (UniProtKB ID: B3U3M3) was obtained from the EXPASY proteomic server (21) (<http://ca.expasy.org/>). The template search was performed at the Blast server (<http://blast.ncbi.nlm.nih.gov/Blast.cgi>) using the Protein Data Bank (22) (PDB; <http://www.pdb.org/pdb/home/home.do>) as database and the default options. The T-COFFEE algorithm was used to provide a multiple-alignment between the amino acid

244 sequences of the template proteins and ZVRP. Subsequently, the construction of the  
245 SFV-ZVRP complex was performed using MODELLER 9.16 software(23) that  
246 employs spatial restriction techniques based on the 3D-template structure. The  
247 preliminary model was refined in the same software, using three cycles in the default  
248 optimization protocol. Thus, the model structural evaluation was carried out using two  
249 independent algorithms in the SAVES server  
250 ([http://nihserver.mbi.ucla.edu/SAVES\\_3/](http://nihserver.mbi.ucla.edu/SAVES_3/)): PROCHECK software(24) (stereochemical  
251 quality analysis); and VERIFY 3D(25) (compatibility analysis between the 3D model  
252 and its own amino acid sequence, by assigning a structural class based on its location  
253 and environment, and by comparing the results with those of crystal structures).

254 **Metagenomics and genome assembly.** A 0.3 mL of supernatant containing the ZIKV  
255 ( $2 \times 10^5$  PFU) was filtered through 0.22  $\mu$ m filters to remove residual culture cells. The  
256 virus RNA was extracted using QIAamp Viral RNA Mini Kit (Qiagen®) with DNase  
257 RNase-free (Qiagen®) treatment, omitting carrier RNA. Double-stranded cDNA  
258 libraries were constructed by Truseq Stranded total RNA LT (Illumina®) with Ribo-zero  
259 treatment, according to the manufacture's instruction. The library size distribution was  
260 assessed using 2100 Bioanalyzer (Agilent®) with High Sensitive DNA kit (Agilent®),  
261 and the quantification was performed with 7500 Real-time PCR System (Applied  
262 Biosystems®) with KAPA Library Quantification Kit (Kapa Biosystems). Paired-end  
263 sequencing (2 x 300 bp) was done with MiSeq Reagent kit v3 (Illumina®). The  
264 sequences obtained were preprocessed using the PRINSEQ software to remove reads  
265 smaller than 50 bp and sequences with scores of lower quality than a Phred quality  
266 score of 20. Paired-End reAd merger (PEAR) software was used to merge and extend  
267 the paired-end Illumina reads using the default parameters(26, 27). The extended reads  
268 were analyzed with Deconseq program, against the Human Genome Database, with

269 Identity and Coverage cutoff of 70%, to remove human RNA sequences(28). Non-  
270 human reads were analyzed against all GenBank viral genomes (65,052 sequences)  
271 through BLAST software using 1e-5 e-value cutoff. The sequences rendering a genome  
272 were assembled with SPAdes 3.7.1 software(29) followed by a reassemble with CAP3  
273 program(30).

274 **Sequence comparisons.** Sequences encoding for the C-terminal portion of the RNA  
275 polymerase form members of the *Flaviviridae* family were acquired from complete  
276 sequence deposited in GenBank. Alignment was made using the ClustalW algorithm in  
277 Mega 6.0 software. Sequences were analyzed using neighbor-joining, with pairwise  
278 deletion, with bootstrap of 1,000 replicated and *P* distances were registered. Sequences  
279 were also analyzed for mean evolutionary rate.

280 **Statistical analysis.** All assays were performed and codified by one professional.  
281 Subsequently, a different professional analyzed the results before identification of the  
282 experimental groups. This was done to keep the pharmacological assays as blind. All  
283 experiments were carried out at least three independent times, including technical  
284 replicates in each assay. The dose-response curves to calculate EC<sub>50</sub> and CC<sub>50</sub> values  
285 were generated by Excel for Windows. Dose-response curve to calculate IC<sub>50</sub> values  
286 were obtained by Prism graphpad software 5.0. The equations to fit the best curve were  
287 considered based on the R<sup>2</sup> values ≥ 0.9. Above mentioned are the statistical analysis  
288 specific to each program software used in the bioinformatics analysis.

## 289 **RESULTS**

290 **Sofosbuvir fits on the ZVRP predicted structure.** The RNA polymerase structures  
291 from WNV (PDB # 2HFZ) (31), JEV (PDB # 4K6M) (32), DENV (PDB # 5DTO) (33)  
292 and HCV (PDB # 4WTG) (34) share 72, 70, 68, and 25 % sequence identity with ZIKV  
293 orthologue enzyme, respectively. Despite that, the HCV enzyme is complexed with  
294 sofosbuvir and the amino acids residues that interacts with this drug are highly

conserved over members of the *Flaviviridae* family, around 80 % (34). The region encoding for the C-terminal portion of *Flaviviridae* RNA polymerase contains around the 800 amino acid residues and identical residues are highlighted in yellow (Supplementary Material 1). The residues critical for RDRP activity are conserved among different viral species and strains, including: ZIKV African strain from the 50's and those circulating currently, DENV and different genotypes of HCV (Supplementary Material 1) (35).

Based on the HCV RNA-direct RNA-polymerase domain, we constructed a 3D model for ZIKV orthologue enzyme (Figure 1). Sofosbuvir was located among the palm and fingers region of ZIKV RNA polymerase (Figure 1A), an area important to coordinate the incorporation of incoming nucleotides into the new strand of RNA (34). Consequently, amino acid residues relevant to sofosbuvir interaction are some of those critical for natural nucleotide incorporation and thus RDRP activity (Figure 1B) (34). The amino acid residues involved with the interaction with sofosbuvir are identical or conserved among the members of the *Flaviviridae* family (Supplementary Material 2). The conserved residues are considered to be evolving slower than other residues of this enzyme (Supplementary Material 2). These information mean that residues predicted to be required for interaction with sofosbuvir tend to be conserved among members of *Flaviviridae* family.

**Sofosbuvir inhibits ZVRP in a dose-dependent fashion.** Next, we evaluated whether sofosbuvir triphosphate (STP), the bioactive compound, could inhibit ZIKV RDRP activity. Fractions containing the ZIKV RDRP activity were purified from infected cells (17). STP inhibited ZIKV RDRP activity with an  $IC_{50}$  value of  $0.38 \pm 0.03 \mu M$  (Figure 2). Ribavirin-triphosphate (RTP) and AZT-TP were used as positive and negative controls, respectively (Figure 2). RTP and AZT-TP presented  $IC_{50}$  values of  $0.21 \pm 0.06$  and  $> 10 \mu M$ , respectively (Figure 2). The data from Figure 2, confirmed the molecular modeling prediction that sofosbuvir docked onto ZVRP structure and, revealed that sofosbuvir chemical structure inhibits ZIKV RDRP activity.

**Sofosbuvir inhibits ZIKV replication in cell-, MOI- and dose-dependent manner.** Sofosbuvir phosphoramidate prodrug must be converted to its triphosphate analog within the cellular environment to become active. Therefore, we investigated whether sofosbuvir inhibits ZIKV replication in cellular systems. Before that, we isolated a Brazilian ZIKV strain from a confirmed case of zika fever and characterized this isolate for experimental use. The full-length virus genome was sequenced (GenBank accession

329 # KX197205) and characteristic plaque forming units (PFU) and cytopathic effect  
330 (CPE) were detected in BHK-21 cells (Figure S1). Another concern was to establish  
331 whether other plaque-forming viral agents was co-isolated, which could be misleading  
332 to interpret the antiviral activity. Metagenomic analysis reveal that ZIKV was the only  
333 full-length genome of a plaque-forming virus in BHK-21 detected (Supplementary  
334 Material 3).

335 After the characterization of a Brazilian ZIKV strain for experimental virology  
336 assays, we evaluated the ZIKV susceptibility to sofosbuvir. BHK-21, Vero or human  
337 neuroblastoma (SH-Sy5y) cells were inoculated at different MOIs and treated with  
338 various concentrations of sofosbuvir. Supernatant from these cells were collected and  
339 infectious virus progeny titrated. Sofosbuvir induced a MOI- and dose-dependent  
340 inhibition of ZIKV replication (Figure 3A and B, Table 1 and Figure S2). Potency and  
341 efficiency to inhibit ZIKV replication were higher in SH-Sy5y than BHK-21 cells  
342 (Figure 3A and B, Table 1 and Figure S2). Of note, over 10  $\mu$ M of sofosbuvir did not  
343 inhibit ZIKV replication in Vero cells, indicating a cell-dependent inhibition of ZIKV  
344 replication. IFN- $\alpha$  and ribavirin were used as positive controls to inhibit ZIKV  
345 replication (Figure 3A and B, Table S1 and Figure S2).

346 Sofosbuvir cytotoxicity was also cell type-dependent (Table 1), being less  
347 cytotoxic for SH-Sy5y than for BHK-21 cell line. Our results indicate that the  
348 selectivity index (SI; which represents the ratio between CC<sub>50</sub> and EC<sub>50</sub> values) for  
349 sofosbuvir varied from 185 to 653 (Table 1) – being safer at MOI equals to 0.5 in the  
350 neuroblastoma cell line. For comparisons, SI values for sofosbuvir were up to 5 times  
351 higher than for ribavirin (Table 1). Our data point out that that sofosbuvir chemical  
352 structure is endowed with anti-ZIKV activity and efforts to promote its broader  
353 activation in different cellular types could lead to the development to new anti-ZIKV  
354 based therapies.

355

## 356 Discussion

357 ZIKV is a member of *Flaviviridae* family, such as other clinically relevant  
358 viruses, such as DENV, WNV, JEV and HCV. Among this family, ZIKV was  
359 considered to be a virus causing only mild and self-limited infections (6). However,  
360 based on clinical evidence and laboratorial data, ZIKV infection was associated with  
361 neurological-related morbidities, with impacts on the development of human nervous  
362 system and triggering of GBS (7, 8, 14, 36-39). Antiviral treatment options are thus

363 required to block viral replication. Previous studies have demonstrated that the anti-  
364 malarial drug chloroquine and novel nucleoside analogs inhibit ZIKV replication (11-  
365 13). Here, we show that the clinically approved uridine nucleotide analog anti-HCV  
366 drug, sofosbuvir, is endowed with anti-ZIKV activity.

367 Delvecchio et al. evaluated the pharmacological activity of chloroquine against  
368 ZIKV replication (11). The authors used a clinically approved drug feasible to be used  
369 in pregnant women. The pharmacological activity of chloroquine against ZIKV  
370 replication in Vero cells, which produce high virus titers, and relevant cellular models  
371 for studying ZIKV neurotropic replication were evaluated. The African ZIKV isolate  
372 used, which is differently than the one circulating currently. Besides, chloroquine's  
373 potency over ZIKV replication is around 10  $\mu$ M, whereas against different species of  
374 *Plasmodium* it acts at the sub-micromolar range. This means that the 500 mg chloroquine  
375 tablets approved for clinical use to treat malaria might not be enough to treat ZIKV  
376 infection. The mechanism by which chloroquine inhibits ZIKV replication has not been  
377 characterized. Whether it inhibits the viral life cycle directly or enhances cell survival  
378 must be investigated.

379 The studies from Zmurko et al. and Eyer et al. show the anti-ZIKV activity  
380 novel nucleoside analogs (12, 13). Zmurko et al. characterized their studied molecule  
381 *in vitro*, indicating its ability to target the ZIKV RNA polymerase, and *in vivo* (12).  
382 Eyer et al. evaluated a broad range of nucleoside/nucleotide analogs, including  
383 clinically approved drugs, pointing out to another novel molecule (13). In these  
384 studies, the authors also used the African ZIKV strain and the pharmacological  
385 activity has not been characterized in neuronal cell lines. As these works have focused  
386 on novel molecules, the translation of their data into clinical trials will require further  
387 extensive studies.

388 Sofosbuvir chemical structure is endowed with anti-ZIKV activity, by different  
389 approaches we observed that. Predicted ZVRP structure suggest that sofosbuvir required  
390 critical amino acid residues for ribonucleotide incorporation, such as Arg473, Gly538,  
391 Trp539, Lys691. These results could anticipate that genetic barrier for antiviral  
392 resistance would be high. That is, changes in these residues would jeopardize enzyme  
393 activity. Such a high genetic barrier is found to the emergence of sofosbuvir-resistant  
394 strains of HCV (34). The fluoride radical in sofosbuvir ribosyl moiety is coordinated by  
395 the Asn612, an interaction involved with the drug selectivity to RDRP, which may

avoid unspecific effects towards the cellular DNA-dependent RNA-polymerase. The Lys458 seems to be the docking residue for the uridine analog. Further enzymatic studies with site-directed mutagenesis to this residue could confirm its participation for sofosbuvir docking.

Sofosbuvir produced a dose-dependent inhibition of ZIKV replication with different magnitudes in terms of potency and efficiency in BHK-21 and SH-Sy5y cells. On the other hand, we observed no inhibition of viral replication with over 10  $\mu$ M in Vero cells. Similarly, in the recent study from Eyer et al. (13), African ZIKV susceptibility sofosbuvir was screened in Vero cells, and this compound did not emerged as a potential hit. Although Eyer et al. (13) and us used different viral strains, we reached similar results in Vero cells. Interestingly, sofosbuvir is a substrate for glycoprotein-P (40). Differently than in BHK-21 and Sh-Sy5y, proteomic data reveal that Vero cells express this multi-drug resistance ABC-transporter, which may cause sofosbuvir efflux out of the cell (41-43).

Of note, although we succeed to determine the sofosbuvir antiviral activity against ZIKV in different cell types, this drug metabolism *in vivo* occurs mainly in the liver and adjacent organs. Different experimental *in vivo* infection assays have been studied (ref). Prior to the detection of the ZIKV in the nervous system, virus is found in peripheral organs, such as in spleen and liver (12, 44-46). We believe this could be an insight from the natural history of the ZIKV infection in patients. That is, it is likely that before reaching sites of immune privilege, such as the nervous system or the placental barrier, ZIKV virions may be amplified in peripheral organs and provoke an inflammation response to disrupt the specific barriers. Although the role of the liver during ZIKV infection is currently overlooked, ZIKV could replicate in the liver before its systemic spread. Indeed, it has been reported for some ZIKV-infected patients that liver transaminase levels are enhanced during the onset of illness (47). Moreover, DENV viral loads are increased in the liver and represent one of the hallmarks of this other flavivirus pathogenesis. Naturally, liver is the main site of HCV replication. Therefore, *in vivo* experimental assays are necessary to better determine sofosbuvir capacity to acting as a therapeutic or prophylactic agent during ZIKV experimental infection.

ZIKV-associated microcephaly and GBS highlights that antiviral interventions are urgent. Our data reveal that a clinically approved drug is endowed with antiviral



activity against ZIKV. Thus, the potential second use of sofosbuvir, an anti-HCV drug, against ZIKV seems to be plausible.

# **AUTHORS CONTRIBUTIONS**

C.Q.S., G.R.deM., N.R., L.V.B.H., M.M., C.S.deF., N.F.-R., A.M., A.C., G.B.-L., E.de M.V., D.A.T. and L.L. – contributed with experiment execution and analysis.  
M.M.B., F.A.B., P.B., N.B., F.L.T., A.M.B.deF., K.B. and T.M.L.S. – Data analysis manuscript preparation and revision  
K.B. and T.M.L.S. – Conceptualized the study  
All authors revised and approved the manuscript.

# **ACKNOWLEDGEMENTS**

Thanks are due to Drs. Carlos M. Morel, Marcio L. Rodrigues, Renata Curi and Fabrícia Pimenta for strong advisement and support regarding technological development regarding this project. This work was supported by Conselho Nacional de Desenvolvimento e Pesquisa (CNPq), Fundação de Amparo à Pesquisa do Estado do Rio de Janeiro (FAPERJ).

**The authors declare no competing financial interests.**

# **REFERENCES**

1. Musso D, Gubler DJ. Zika Virus. Clin Microbiol Rev. 2016;29(3):487-524.
2. Musso D, Roche C, Robin E, Nhan T, Teissier A, Cao-Lormeau VM. Potential sexual transmission of Zika virus. Emerg Infect Dis. 2015;21(2):359-61.
3. DICK GW, KITCHEN SF, HADDOW AJ. Zika virus. I. Isolations and serological specificity. Trans R Soc Trop Med Hyg. 1952;46(5):509-20.
4. Faria NR, Azevedo RoS, Kraemer MU, Souza R, Cunha MS, Hill SC, et al. Zika virus in the Americas: Early epidemiological and genetic findings. Science. 2016;352(6283):345-9.
5. Solomon T, Baylis M, Brown D. Zika virus and neurological disease-approaches to the unknown. Lancet Infect Dis. 2016;16(4):402-4.
6. Cerbino-Neto J, Mesquita EC, Souza TM, Parreira V, Wittlin BB, Durovni B, et al. Clinical Manifestations of Zika Virus Infection, Rio de Janeiro, Brazil, 2015. Emerg Infect Dis. 2016;22(6).
7. Calvet G, Aguiar RS, Melo AS, Sampaio SA, de Filippis I, Fabri A, et al. Detection and sequencing of Zika virus from amniotic fluid of fetuses with microcephaly in Brazil: a case study. Lancet Infect Dis. 2016.
8. Cao-Lormeau VM, Blake A, Mons S, Lastère S, Roche C, Vanhomwegen J, et al. Guillain-Barré Syndrome outbreak associated with Zika virus infection in French Polynesia: a case-control study. Lancet. 2016.
9. Chutaputti A. Adverse effects and other safety aspects of the hepatitis C antivirals. J Gastroenterol Hepatol. 2000;15 Suppl:E156-63.
10. Control C-CFD. 2014 [
11. Rodrigo Delvecchio LMH, Paula Pezzuto, Ana Luiza Valadao, Patricia P Garcez, Fabio L Monteiro, Erick C Loiola, Stevens Rehen, Loraine Campanati, Renato Santana de Aguiar,



Amilcar Tanuri. Chloroquine inhibits Zika Virus infection in different cellular models. bioRxiv preprint. 2016.

12. Zmurko J, Marques RE, Schols D, Verbeken E, Kaptein SJ, Neyts J. The Viral Polymerase Inhibitor 7-Deaza-2'-C-Methyladenosine Is a Potent Inhibitor of In Vitro Zika Virus Replication and Delays Disease Progression in a Robust Mouse Infection Model. *PLoS Negl Trop Dis*. 2016;10(5):e0004695.

13. Eyer L, Nencka R, Huvarová I, Palus M, Joao Alves M, Gould EA, et al. Nucleoside inhibitors of Zika virus. *J Infect Dis*. 2016.

14. Garcez PP, Loiola EC, Madeiro da Costa R, Higa LM, Trindade P, Delvecchio R, et al. Zika virus impairs growth in human neurospheres and brain organoids. *Science*. 2016.

15. Piperno A, Cordaro M, Scala A, Iannazzo D. Recent highlights in the synthesis of anti-HCV ribonucleosides. *Curr Med Chem*. 2014;21(16):1843-60.

16. Bhatia HK, Singh H, Grewal N, Natt NK. Sofosbuvir: A novel treatment option for chronic hepatitis C infection. *J Pharmacol Pharmacother*. 2014;5(4):278-84.

17. Souza TML, De Souza M, Ferreira VF, Canuto C, Marques IP, Fontes CFL, et al. Inhibition of HSV-1 replication and HSV DNA polymerase by the chloroquinolinic ribonucleoside 6-chloro-1,4-dihydro-4-oxo-1-(beta-D-ribofuranosyl) quinoline-3-carboxylic acid and its aglycone. *Antiviral Research*. 2008;77(1):20-7.

18. Hottz ED, Lopes JF, Freitas C, Valls-de-Souza R, Oliveira MF, Bozza MT, et al. Platelets mediate increased endothelium permeability in dengue through NLRP3-inflammasome activation. *Blood*. 2013;122(20):3405-14.

19. Scudiero DA, Shoemaker RH, Paull KD, Monks A, Tierney S, Nofziger TH, et al. Evaluation of a soluble tetrazolium/formazan assay for cell growth and drug sensitivity in culture using human and other tumor cell lines. *Cancer Res*. 1988;48(17):4827-33.

20. Tan BH, Fu J, Sugrue RJ, Yap EH, Chan YC, Tan YH. Recombinant dengue type 1 virus NS5 protein expressed in *Escherichia coli* exhibits RNA-dependent RNA polymerase activity. *Virology*. 1996;216(2):317-25.

21. Gasteiger E, Gattiker A, Hoogland C, Ivanyi I, Appel RD, Bairoch A. ExPASy: The proteomics server for in-depth protein knowledge and analysis. *Nucleic Acids Res*. 2003;31(13):3784-8.

22. Dutta S, Burkhardt K, Young J, Swaminathan GJ, Matsuura T, Henrick K, et al. Data deposition and annotation at the worldwide protein data bank. *Mol Biotechnol*. 2009;42(1):1-13.

23. Sali A, Blundell TL. Comparative protein modelling by satisfaction of spatial restraints. *J Mol Biol*. 1993;234(3):779-815.

24. R. A. Laskowski MWM, D. S. Moss and J. M. Thornton, TI. PROCHECK: a program to check the stereochemical quality of protein structures. *Journal of Applied Crystallography*. 1993;26(2):283-91.

25. Eisenberg D, Lüthy R, Bowie JU. VERIFY3D: assessment of protein models with three-dimensional profiles. *Methods Enzymol*. 1997;277:396-404.

26. Schmieder R, Edwards R. Quality control and preprocessing of metagenomic datasets. *Bioinformatics*. 2011;27(6):863-4.

27. Zhang J, Kobert K, Flouri T, Stamatakis A. PEAR: a fast and accurate Illumina Paired-End reAd mergeR. *Bioinformatics*. 2014;30(5):614-20.

28. Schmieder R, Edwards R. Fast identification and removal of sequence contamination from genomic and metagenomic datasets. *PLoS One*. 2011;6(3):e17288.

29. Nurk S, Bankevich A, Antipov D, Gurevich AA, Korobeynikov A, Lapidus A, et al. Assembling single-cell genomes and mini-metagenomes from chimeric MDA products. *J Comput Biol*. 2013;20(10):714-37.

30. Huang X, Madan A. CAP3: A DNA sequence assembly program. *Genome Res*. 1999;9(9):868-77.

31. Malet H, Egloff MP, Selisko B, Butcher RE, Wright PJ, Roberts M, et al. Crystal structure of the RNA polymerase domain of the West Nile virus non-structural protein 5. *J Biol Chem*. 2007;282(14):10678-89.
32. Lu G, Gong P. Crystal Structure of the full-length Japanese encephalitis virus NS5 reveals a conserved methyltransferase-polymerase interface. *PLoS Pathog*. 2013;9(8):e1003549.
33. Zhao Y, Soh TS, Lim SP, Chung KY, Swaminathan K, Vasudevan SG, et al. Molecular basis for specific viral RNA recognition and 2'-O-ribose methylation by the dengue virus nonstructural protein 5 (NS5). *Proc Natl Acad Sci U S A*. 2015;112(48):14834-9.
34. Appleby TC, Perry JK, Murakami E, Barauskas O, Feng J, Cho A, et al. Viral replication. Structural basis for RNA replication by the hepatitis C virus polymerase. *Science*. 2015;347(6223):771-5.
35. Ferron F, Bussetta C, Dutartre H, Canard B. The modeled structure of the RNA dependent RNA polymerase of GBV-C virus suggests a role for motif E in Flaviviridae RNA polymerases. *BMC Bioinformatics*. 2005;6:255.
36. Brasil P, Pereira JP, Raja Gabaglia C, Damasceno L, Wakimoto M, Ribeiro Nogueira RM, et al. Zika Virus Infection in Pregnant Women in Rio de Janeiro - Preliminary Report. *N Engl J Med*. 2016.
37. Driggers RW, Ho CY, Korhonen EM, Kuivanen S, Jääskeläinen AJ, Smura T, et al. Zika Virus Infection with Prolonged Maternal Viremia and Fetal Brain Abnormalities. *N Engl J Med*. 2016.
38. Rasmussen SA, Jamieson DJ, Honein MA, Petersen LR. Zika Virus and Birth Defects - Reviewing the Evidence for Causality. *N Engl J Med*. 2016.
39. Smith DW, Mackenzie J. Zika virus and Guillain-Barré syndrome: another viral cause to add to the list. *Lancet*. 2016.
40. Gilead. Product Monograph  
Pr SOVALDI®  
(sofosbuvir) Tablets  
400 mg sofosbuvir Antiviral Agent 2015 [Available from:  
[http://www.gilead.ca/pdf/ca/sovaldi\\_pm\\_english.pdf](http://www.gilead.ca/pdf/ca/sovaldi_pm_english.pdf).
41. Zhong L, Zhou J, Chen X, Lou Y, Liu D, Zou X, et al. Quantitative proteomics study of the neuroprotective effects of B12 on hydrogen peroxide-induced apoptosis in SH-SY5Y cells. *Sci Rep*. 2016;6:22635.
42. Guo D, Zhu Q, Zhang H, Sun D. Proteomic analysis of membrane proteins of vero cells: exploration of potential proteins responsible for virus entry. *DNA Cell Biol*. 2014;33(1):20-8.
43. Guo HC, Jin Y, Han SC, Sun SQ, Wei YQ, Liu XJ, et al. Quantitative Proteomic Analysis of BHK-21 Cells Infected with Foot-and-Mouth Disease Virus Serotype Asia 1. *PLoS One*. 2015;10(7):e0132384.
44. Aman MJ, Kashanchi F. Zika Virus: A New Animal Model for an Arbovirus. *PLoS Negl Trop Dis*. 2016;10(5):e0004702.
45. Dowall SD, Graham VA, Rayner E, Atkinson B, Hall G, Watson RJ, et al. A Susceptible Mouse Model for Zika Virus Infection. *PLoS Negl Trop Dis*. 2016;10(5):e0004658.
46. Lazear HM, Govero J, Smith AM, Platt DJ, Fernandez E, Miner JJ, et al. A Mouse Model of Zika Virus Pathogenesis. *Cell Host Microbe*. 2016;19(5):720-30.
47. Waggoner JJ, Pinsky BA. Zika Virus: Diagnostics for an Emerging Pandemic Threat. *J Clin Microbiol*. 2016;54(4):860-7.

569  
570  
571  
572  
573  
574  
575  
576  
577  
578  
579  
580  
581  
582  
583  
584  
585  
586

# 587 **Legend for the Figures**

588 **Figure 1 – Putative ZIKV RNA polymerase in complex with sofosbuvir.** Based on  
589 the crystal structure of the HCV RNA polymerase in complex with sofosbuvir  
590 diphosphate (PDB accession # 4WTG), the putative structure from ZIKV RNA  
591 polymerase was constructed. The amino acid sequence encoding ZIKV RNA  
592 polymerase (ZVRP) (UniProtKB ID: B3U3M3) was aligned using T-COFFEE server  
593 with orthologue RNA polymerases from members of *Flaviviridae* family, Hepatitis C  
594 virus (HCV; PDB # 4WTG, West Nile virus (WNIV; PDB # 2HFZ), Japanese  
595 Encephalitis virus (JEV; PDB # 4K6M), and Dengue virus (DENV; PDB # 5DTO). The  
596 MODELLER 9.16 software was used to build a 3D-model of ZIKV RNA polymerase,

with subsequent refinement using three cycles in the default optimization protocol. The model structural evaluation was carried out using two independent algorithms, PROCHECK software and VERIFY 3D. (A) The 3D-model of ZIKV RNA polymerase is presented. (B) The residues presumably required for ZIKV RNA polymerase interaction with sofosbuvir and  $Mg^{++}$  ions.

602

**Figure 2 – Sofosbuvir inhibits ZIKV RDRP activity.** Cell extracts from ZIKV-infected cells were assayed for RDRP activity using virus RNA as the template and labelled UTP as the tracer. biotinylated-UTP and digoxigenin-UTP were detected by ALPHA technology using the EnSpire® multimode plate reader instrument (PerkinElmer). The molecules used assayed were sofosbuvir triphosphate (STP), ribavirin triphosphate (RTP) and AZT triphosphate (AZT-TP). As a control, RNA-dependent RNA-polymerase activity was measured in extracts from mock-infected cells (mock). Data represent means  $\pm$  SEM of five independent experiments.

**Figure 3 – The antiviral activity of sofosbuvir against ZIKV.** BHK-21 (A) or SH-Sy5y (B) cells were infected with ZIKV at indicated MOIs, exposed to various concentrations of sofosbuvir or IFN-alpha (inset), and viral replication was measured by plaque-forming assay after 24 h of infection. Data represent means  $\pm$  SEM of five independent experiments.

616

617

618

619

620

621

622

623

624  
625  
626  
627  
628  
629  
630  
631  
632  
633  
634  
635  
636  
637  
638  
639  
640  
641

## 642 **Legend for the Supplementary Figures**

643 **Figure S1 – Plaque assay for ZIKV.** Monolayers of BHK-21 cells were infected for 1  
644 h at 37 °C. After that, viruses were washed out with PBS and wells were covered with  
645 overlay medium with 1 % FBS. At 5 days post-infection, plaques were fixed and  
646 colored with crystal violet. (A) A representative plaque forming unit (PFU) is presented  
647 at 40 x magnification. (B) The PFU and adjacent cellular monolayer is presented at 100  
648 x magnification, some of these cells present ZIKV-induced cytopathic effect (CPE),  
649 three examples are highlighted by the red arrows. (C) A representative closer view of  
650 ZIKV-induced CPE (red arrow).

651 **Figure S2 – The antiviral activity of Sofosbuvir against ZIKV.** BHK-21 or SH-sy5y  
 652 were infected with ZIKV at indicated MOIs, exposed to various concentrations of  
 653 sofosbuvir (A) or IFN-alpha (B), and viral replication was measured by plaque-forming  
 654 assay after 24 h of infection. Data represent means  $\pm$  SEM of three independent  
 655 experiments.

656

657

658

659

660

661

662

663

664

665

666

| Pharmacological |           |                       |           |             |            |           |          |                       |          |     |     |         |     |      |     |
|-----------------|-----------|-----------------------|-----------|-------------|------------|-----------|----------|-----------------------|----------|-----|-----|---------|-----|------|-----|
| Parameter       |           | EC <sub>50</sub> (μM) |           |             |            |           |          | CC <sub>50</sub> (μM) |          |     | SI  |         |     |      |     |
| Cell type       | BHK       |                       | SH-Sy5Y   |             | Vero       |           | BHK      | SH-Sy5Y               | Vero     | BHK |     | SH-Sy5Y |     | Vero |     |
| MOI             | 1.0       | 0.5                   | 1.0       | 0.5         | 1.0        | 0.5       |          |                       |          | 1.0 | 0.5 | 1.0     | 0.5 | 1.0  | 0.5 |
| Sofosbuvir      | 1.9 ± 0.2 | 1.7 ± 0.1             | 1.1 ± 0.2 | 0.65 ± 0.08 | >10        | >10       | 360 ± 43 | 421 ± 34              | 461 ± 32 | 184 | 212 | 384     | 653 | NA   | NA  |
| Ribavirin       | 5.3 ± 0.8 | 3.1 ± 0.6             | 2.9 ± 0.4 | 1.2 ± 0.2   | 6.8 ± 1.2  | 4.8 ± 0.8 | 177 ± 22 | 300 ± 21              | 371 ± 16 | 33  | 57  | 103     | 250 | 54   | 77  |
| IFN-alpha*      | 7.3 ± 0.3 | 2.8 ± 0.3             | 9.8 ± 1.2 | 4.9 ± 0.6   | 10.2 ± 1.6 | 5.9 ± 1.0 | ND       | ND                    | ND       | NA  | NA  | NA      | NA  | NA   | NA  |

**Table 1 – Antiviral activity and cytotoxicity of sofosbuvir**

\*Values are expressed as U/ml, ND – Not determined, NA – Not Applicable





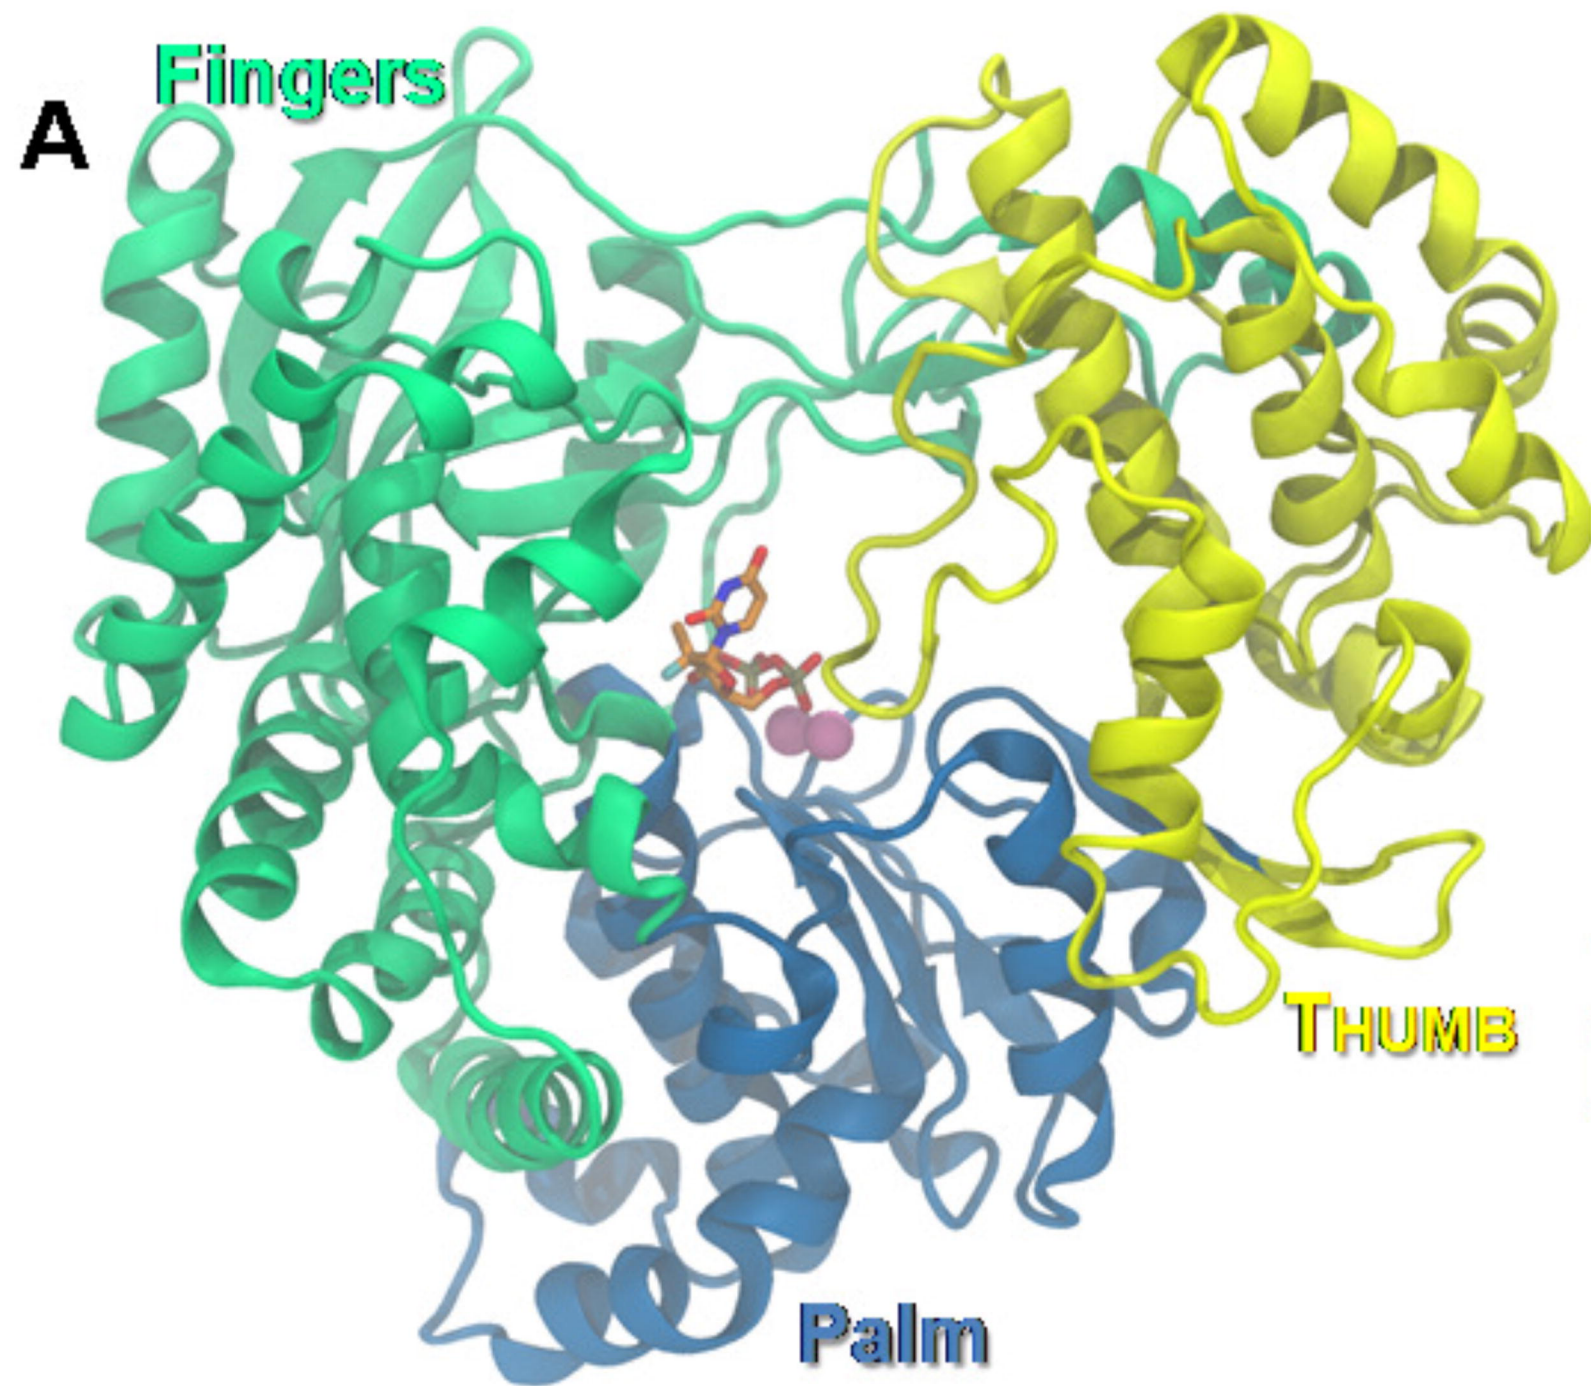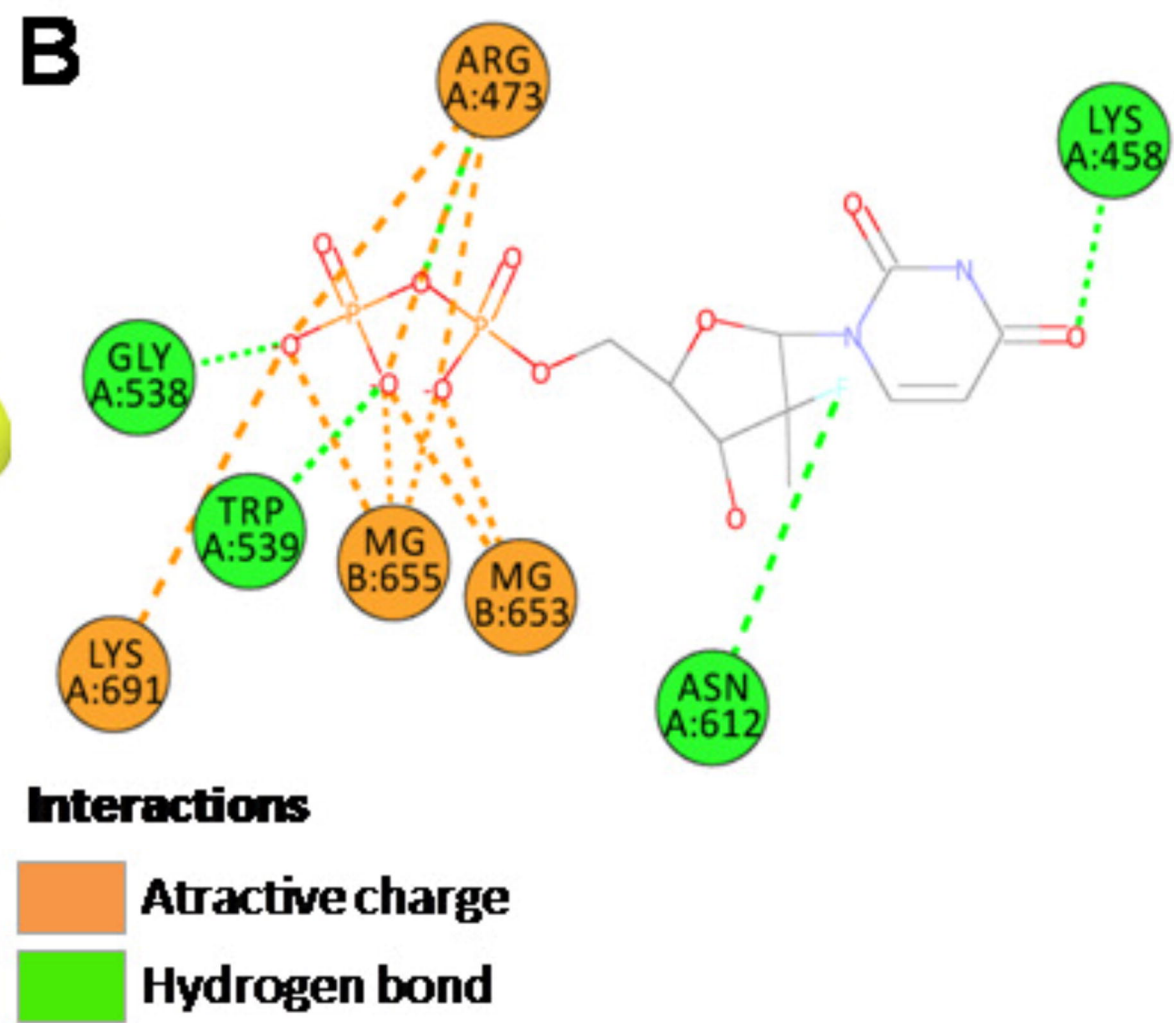

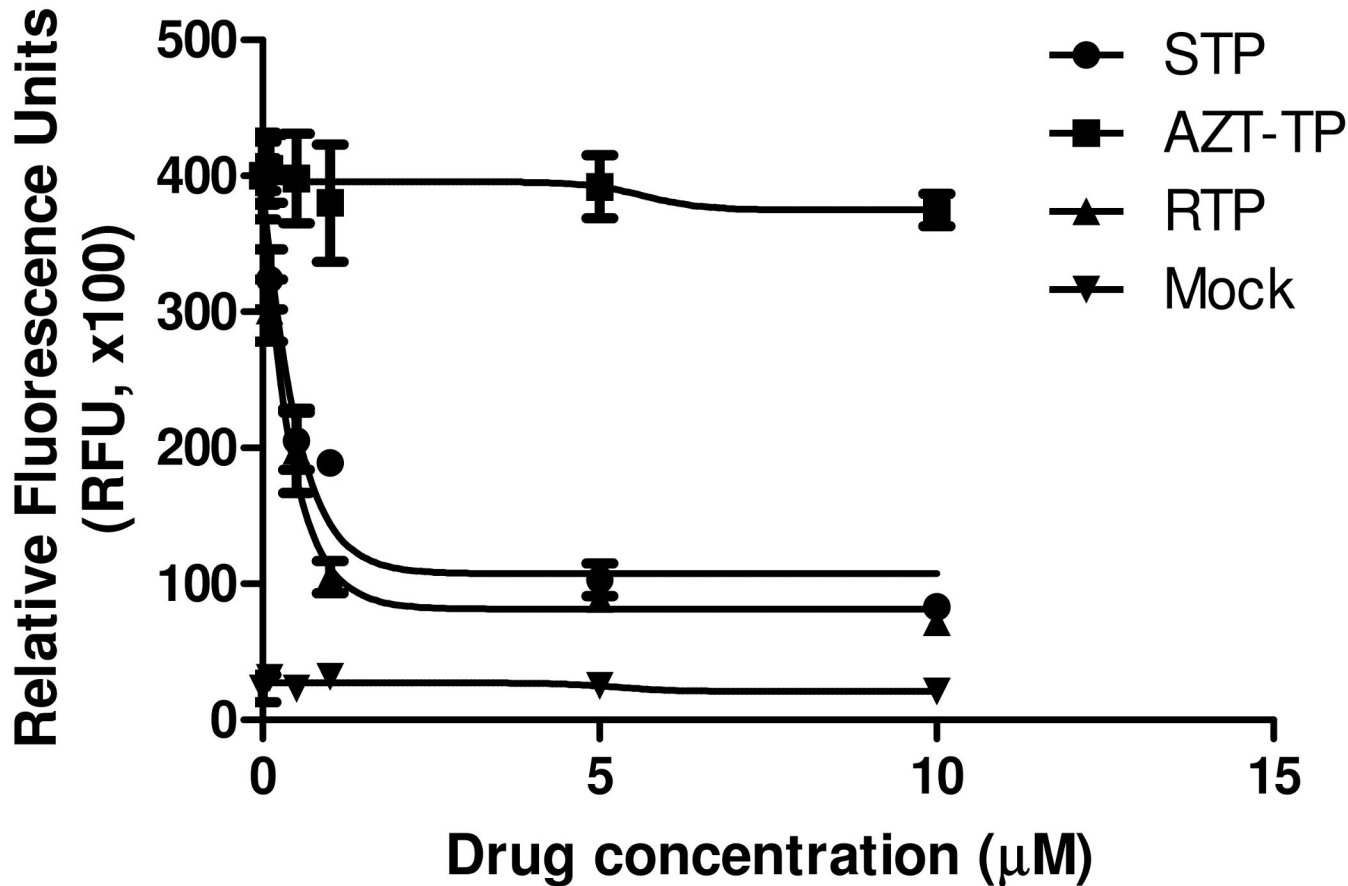

# ZIKV-infected BHK-21 cells

A

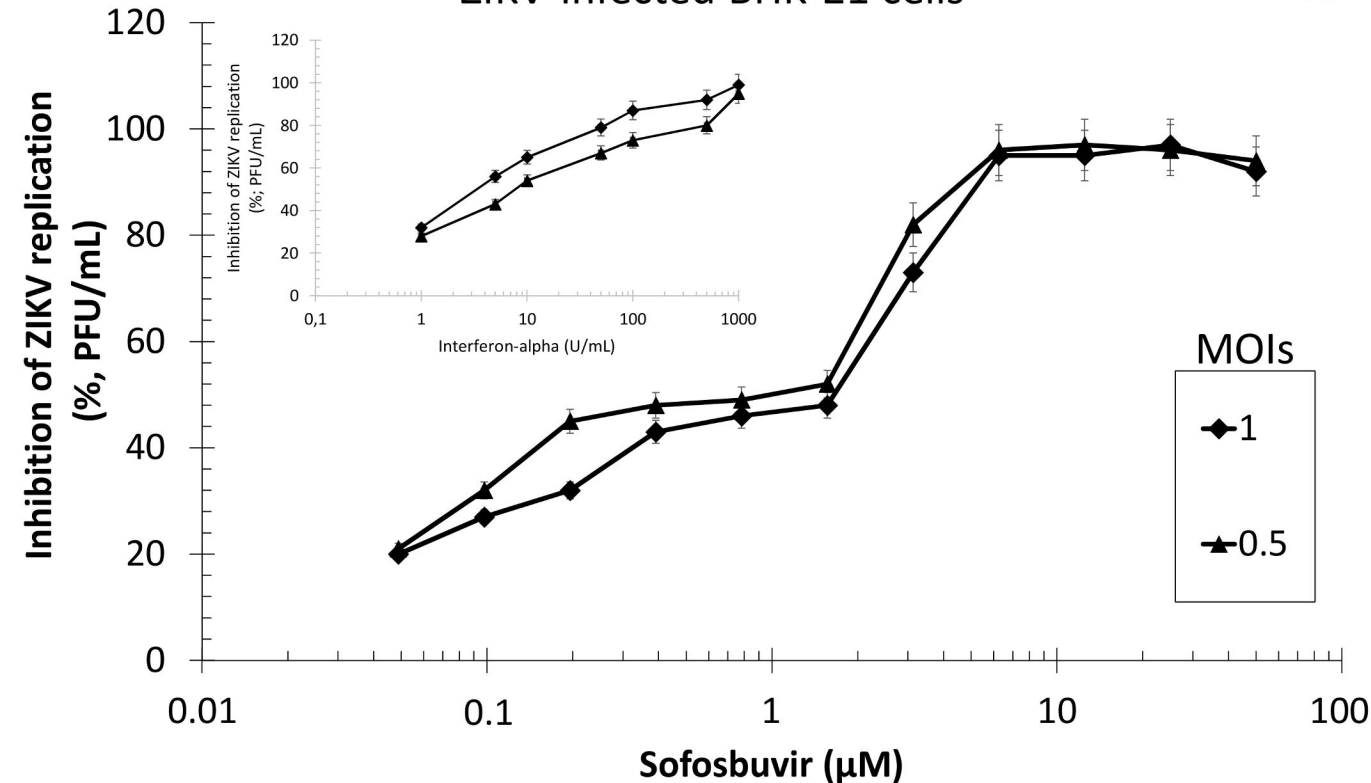

# ZIKV-infected SH-sy5y

**B**

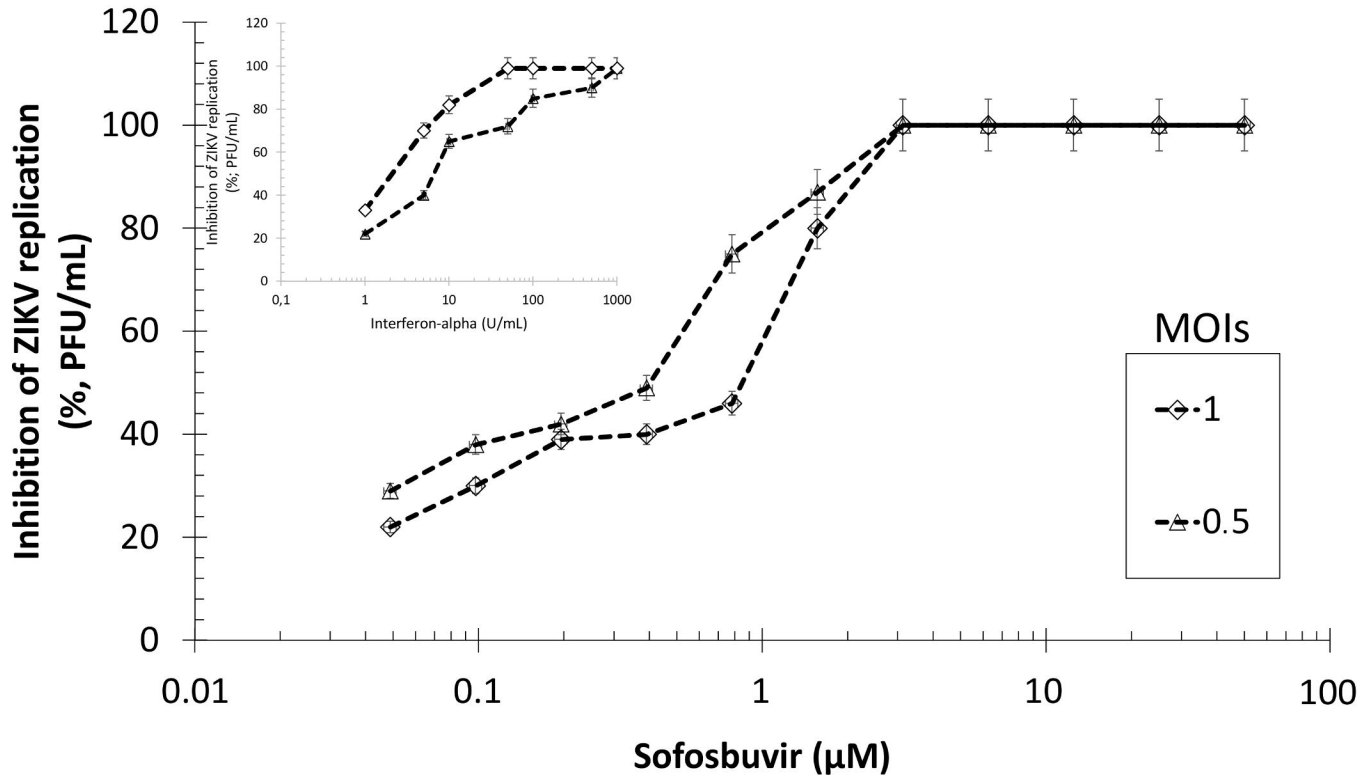



A

200  $\mu\text{m}$



This micrograph, labeled 'A' in the top right corner, displays a dense field of cells with a yellowish-brown hue. A prominent, lighter-colored, circular region is visible in the center of the image. In the bottom right corner, a red scale bar is present, labeled '200 μm'.



**B**

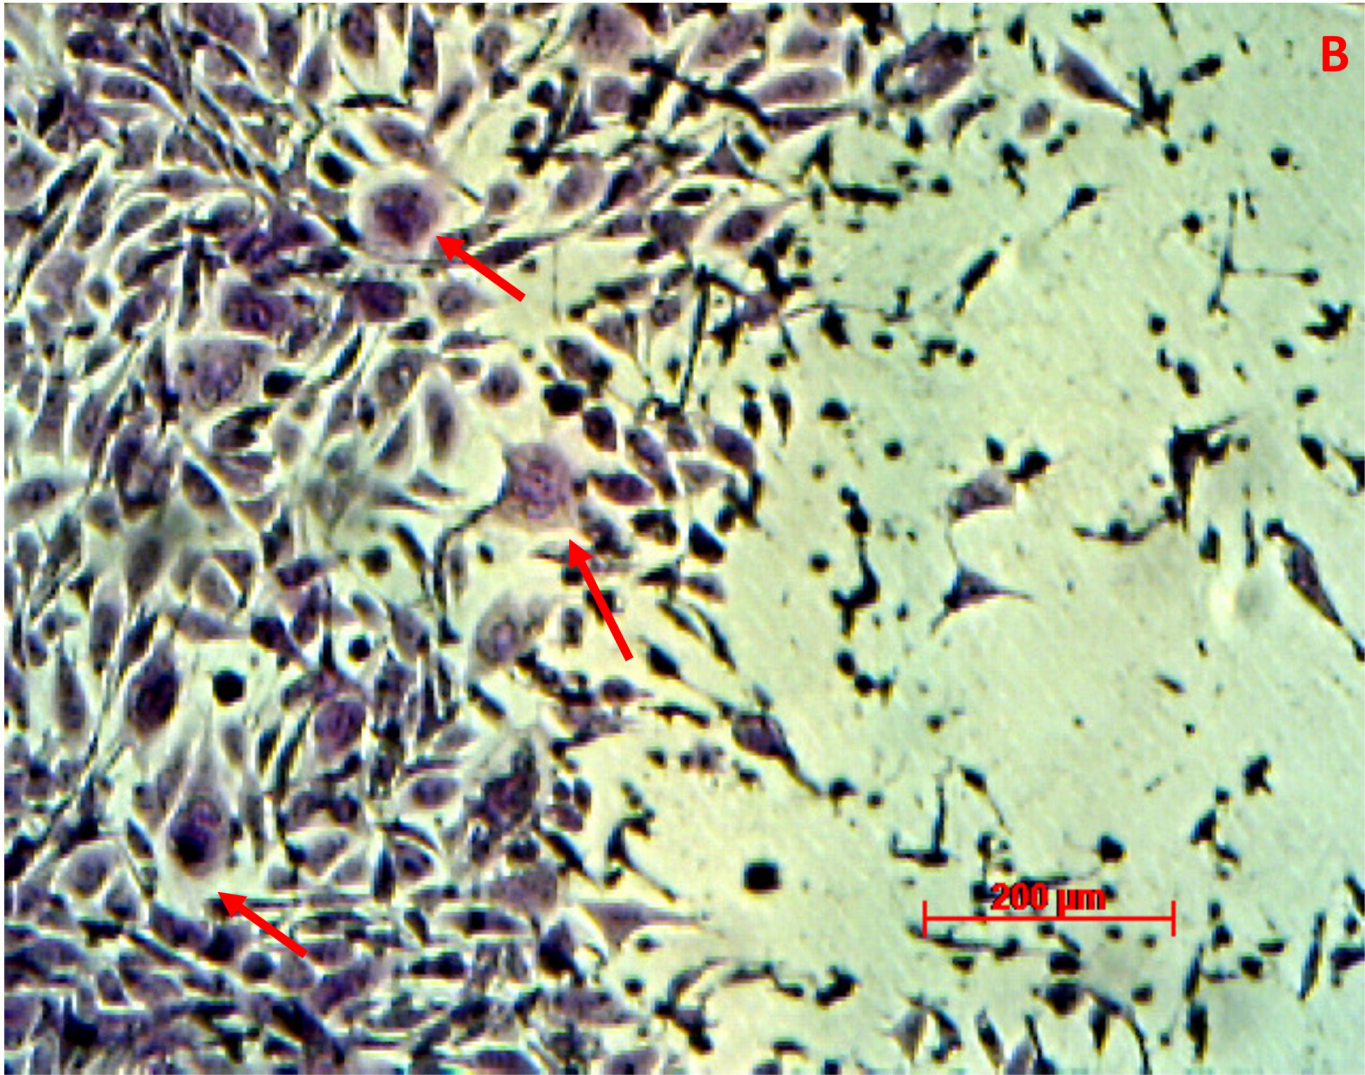



C

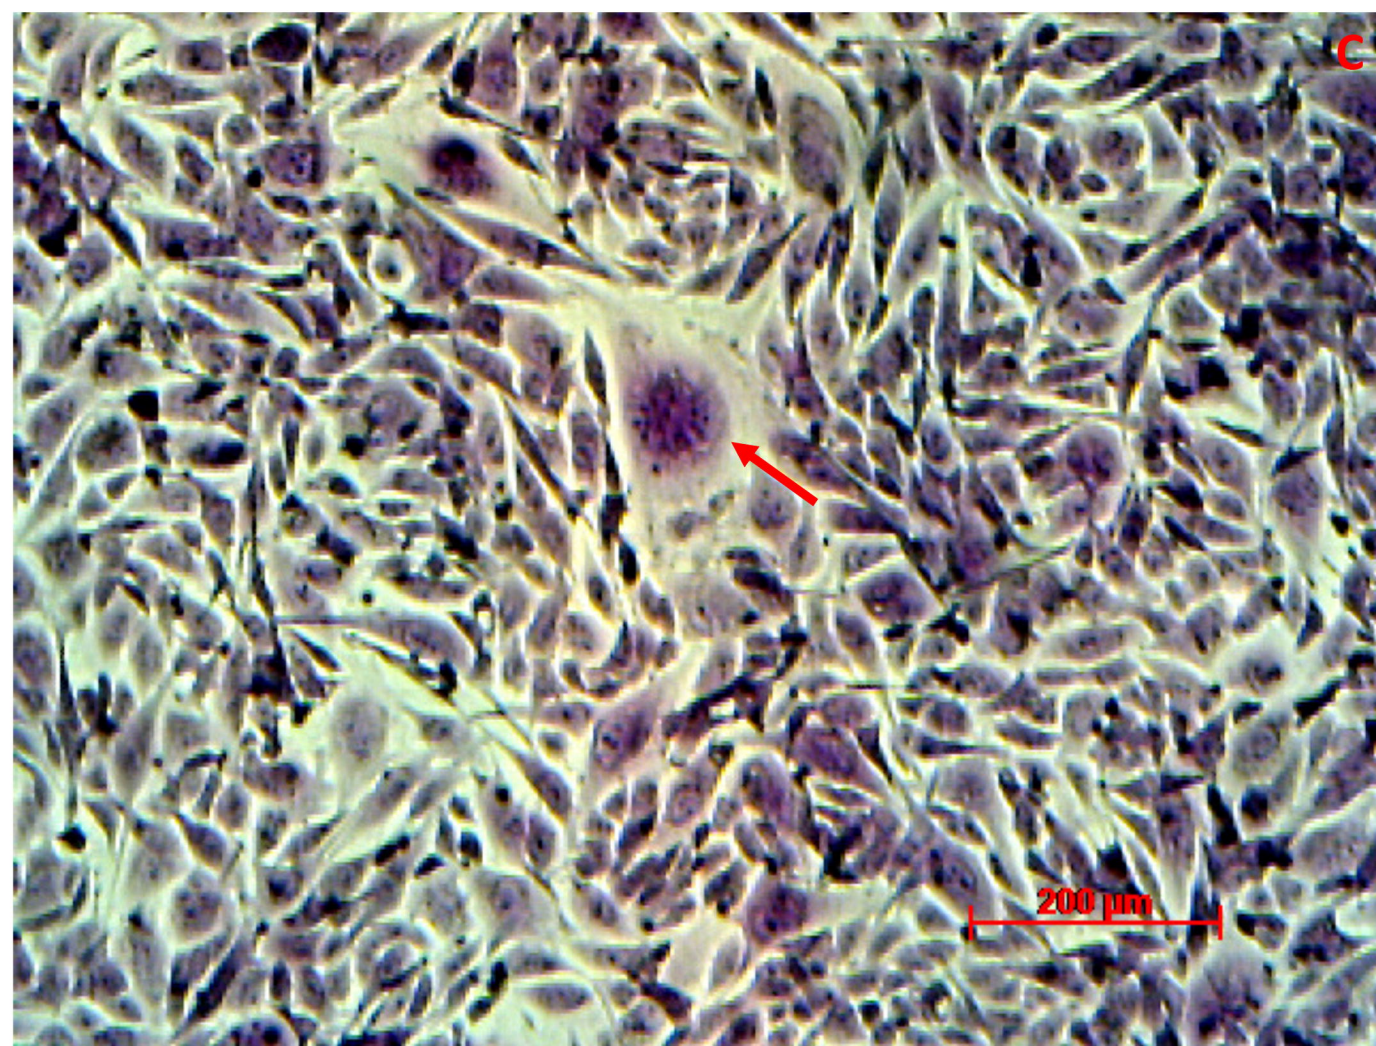

**A**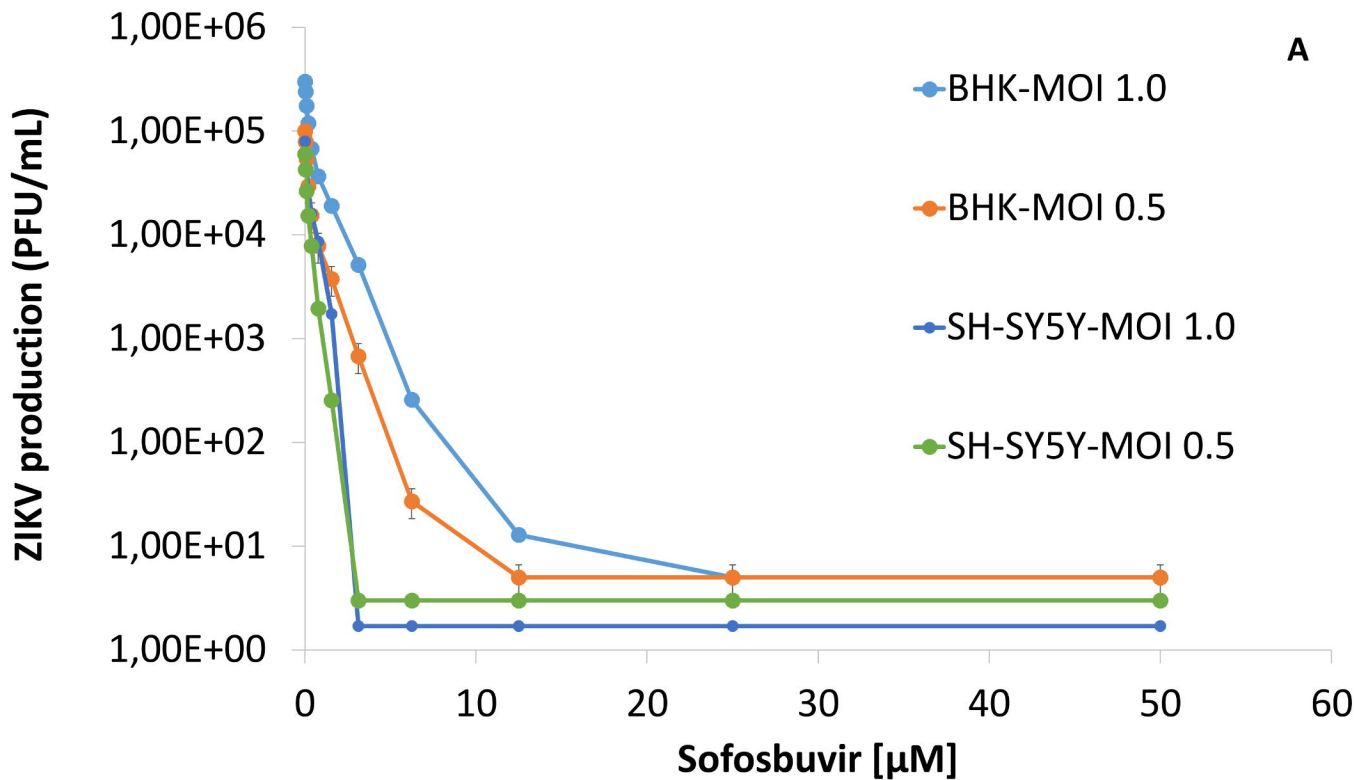



**B**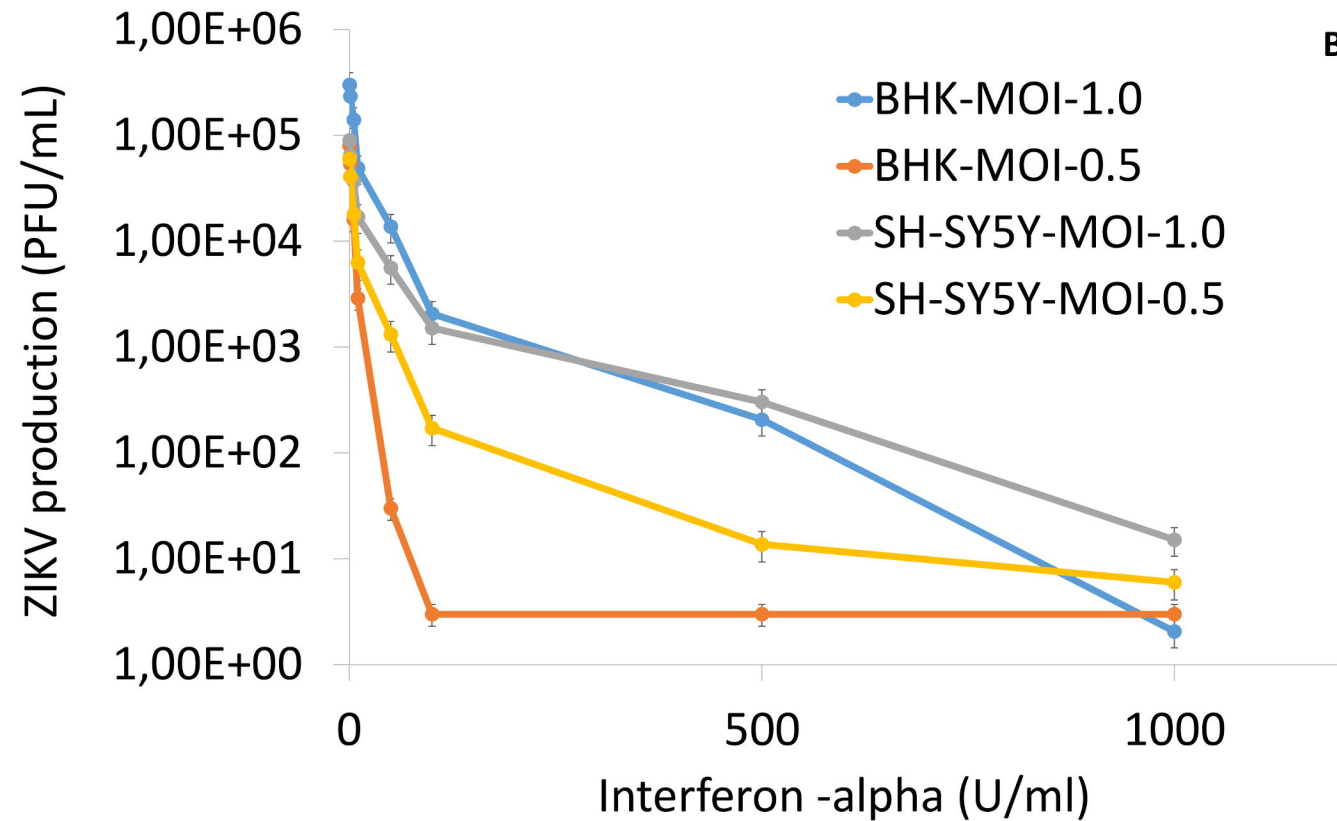

Source: http://biorxiv.org/content/10.1101/061671v1.full.pdf
